# Supplementary material for: Electrochemical lithography: fabrication of nanoscale Si tips by porous anodization of Al/Si waferElectronic supplementary information (ESI) available: Cartoon of tip formation and discussion on the sample anodising under 40 V dc. See http://www.rsc.org/suppdata/cc/b3/b315810a/
Source: Royal Society of Chemistry journal article supplement (doi:10.1039/b315810a), 2004-01-01
Supplement: b315810a.doc [file b315810a.doc]

**ESI Fig. 1** Schematic cartoon of the structural transformation of the sample during ECL.

The time depends on fabrication conditions such as the thickness of the Al film, resistance of Al/Si interface (due to native SiOx layer) and Si substrate, temperature, and concentration and species of the electrolyte, etc.

*i* (a.u.)

Al

Si

SiO*x*

*Time* (s)

A

B

C

The cell tips are connected with the native SiOx layer.

The counter-migrating of the ions and vacancies across the pore bottom starts at this time

The barrier layer of the cell has been thinned due to the field-assisted dissolution.

This will enhance the counter-migrating along the pore bases.

The barrier layer is completely removed if anodizing time is enough, that is, the cell tips of APA mask have been dissolved completely. At this time, the cell will cease to grow up because the Al film is consumed. The counter-migrating of the ions and vacancies across the scalloped cell tips induces the scalloped pore structures within the Si wafer.

The Si below the pore bases has been oxidized and the Si tips developed below the cell walls.

The Si tips are sharpened

**ESI Fig. 2**

Analysis of the tip density.

***D*cell**

cell diameter = interspace of the neighboring cells

**SiAl*x*O*y* island**

Below the pore base of the APA mask.

Ionic incorporated and oxidized Si, Island diameter: ***D***1 **= *D***pore

**Si tip**

Below the junctions of three neighboring cells.

Interspace of the neighboring tip: ***D***tip **= ½*D***cell

**Oxidized Si layer**

Below the cell wall of the APA mask.

Layer thickness: ***D***2 **= ½***(****D***cell ** *D***pore).

**Sketch of the Si surface by ECL**

*Location correlation between Si tip and the cell of the APA mask*

The Si tips by ECL are below the junctions of the boundaries of three or more neighboring cells. If using a highly ordered APA film as the ECL mask, because of the hexagonal geometry of the pores, this number is *three* and should result in the formation of the ordered Si-tip lattice, but in the current study, due to anodizing of thin Al film, the cell lattice of APA mask was partially order, thus induced a random Si-tip arrays shown in Fig. 5.

Based on the above discussion, the theoretic parameters of the Si-tip arrays are as the follow:

Interspace of the neighboring Si tip: ***D***tip **= ½*D***cell

Density of the Si tips: tip = 2cell = 2[***D***cell 2]1

**Note that the tip density is larger than the pore density of the APA mask.**

**ESI Fig. 3**

Top-view TEM image of the free-standing APA mask (dc 40 V sample by ECL). Scale bar is 500 nm.

The calculated surface density of the pores

= counts of the pores/total area of the image

 (3.0-3.2)1010 cm2.


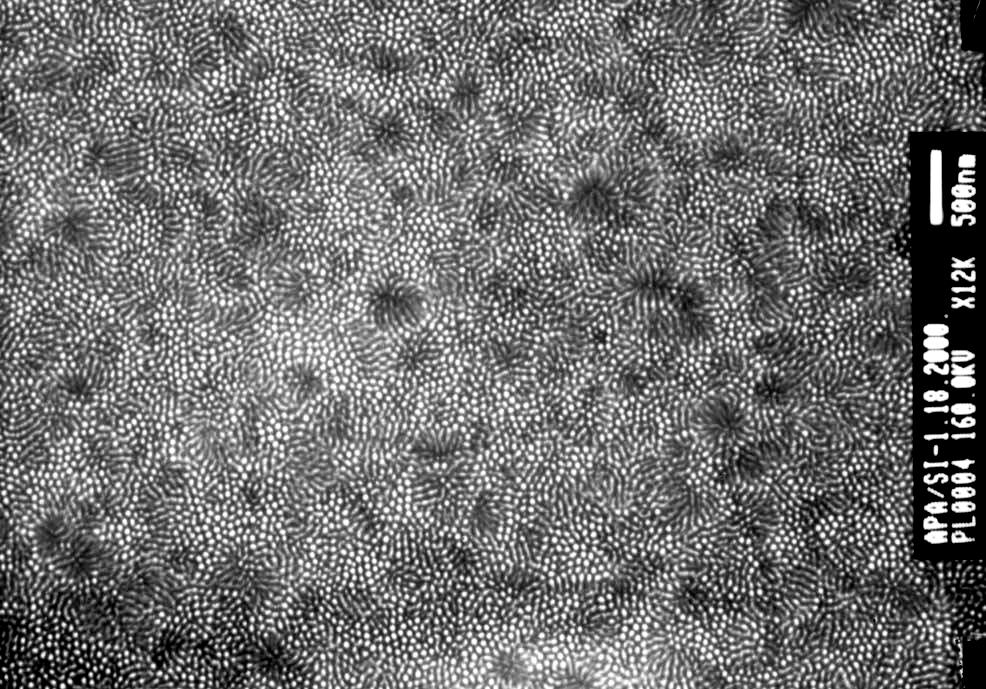


**disorder**

**order**
